# Supplementary material for: New Silver Complexes with Mixed Thiazolidine and Phosphine Ligands as Highly Potent Antimalarial and Anticancer Agents
Source: Hindawi journal article supplement (doi:10.1155/2018/8395374), 2018-07-16
Supplement: f1 [file 8395374.f1.pdf]

## SUPPLEMENTARY MATERIAL

### **New silver complexes with mixed thiazolidine and phosphine ligands as highly potent anti-malarial and anti-cancer agents**

Nur Rahimah Fitrah Mohd Sofyan<sup>1</sup>, Fariza Juliana Nordin<sup>2</sup>, Mohd Ridzuan Mohd Abd Razak<sup>3</sup>, Syahrina Nur 'Ain Abdul Halim<sup>1</sup>, Nur Adila Fatin Mohd Khir<sup>1</sup>, Amirrudin Muhammad<sup>3</sup>, Nor Fadilah Rajab<sup>2</sup>, and Rozie Sarip<sup>1,\*</sup>

<sup>1</sup> Department of Chemistry, Faculty of Science, University of Malaya, Lembah Pantai, 50603 Kuala Lumpur, Malaysia

<sup>2</sup> Faculty of Health Sciences, Universiti Kebangsaan Malaysia, Kuala Lumpur Campus, Jalan Raja Muda Abdul Aziz, 50300 Kuala Lumpur

<sup>3</sup> Bioassay Unit, Herbal Medicine Research Centre, Institute for Medical Research, Jalan Pahang, 50588 Kuala Lumpur, Malaysia

\*Correspondence Rozie Sarip; rozie@um.edu.my

# FTIR

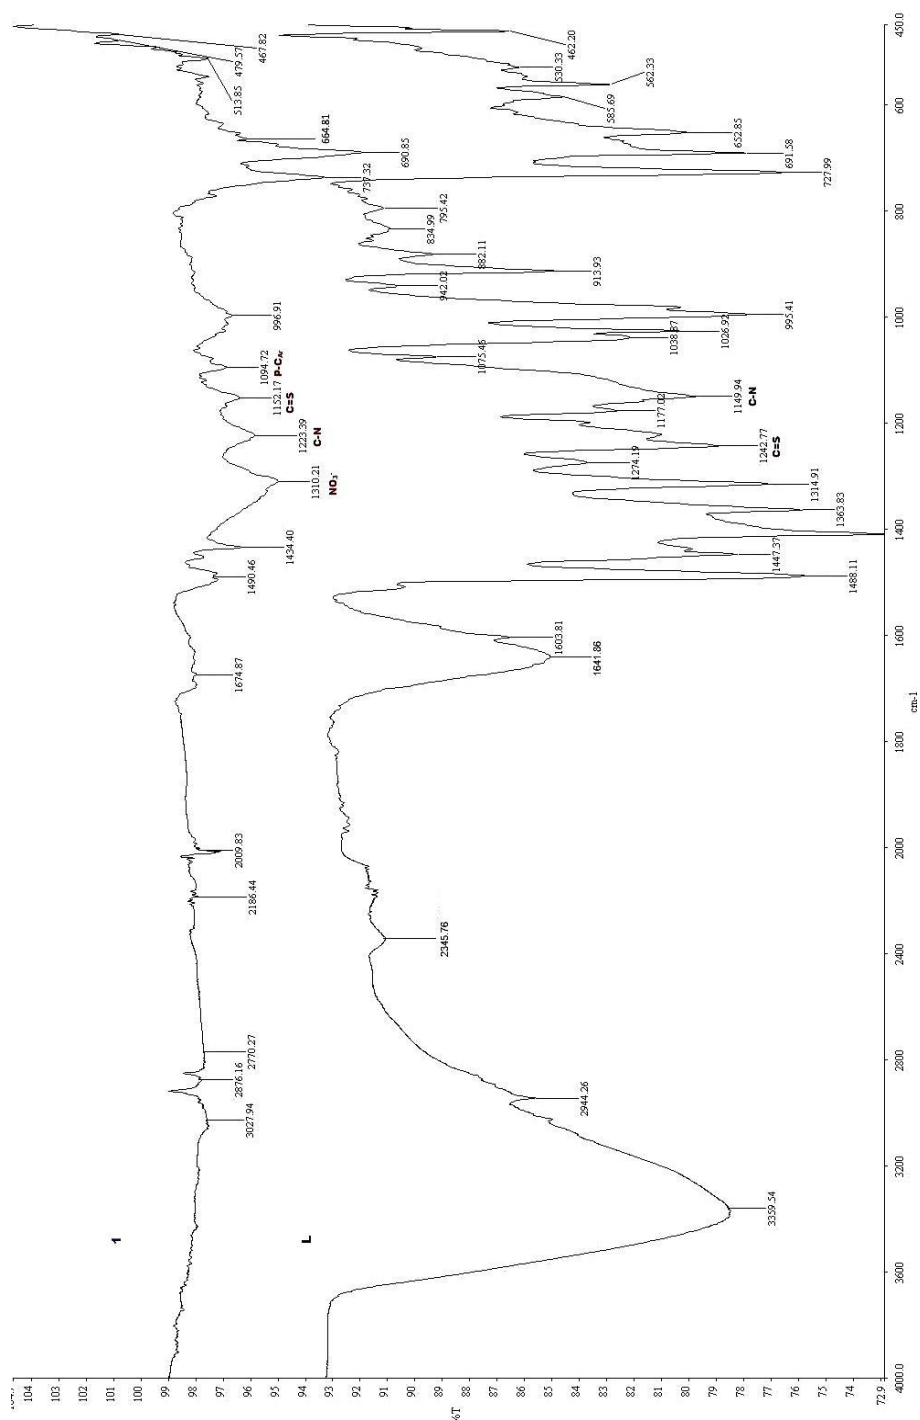

**Figure S1:** Comparison of the FTIR spectra for 3-benzyl-1,3-thiazolidine-2-thione (**L**) and complex **1**

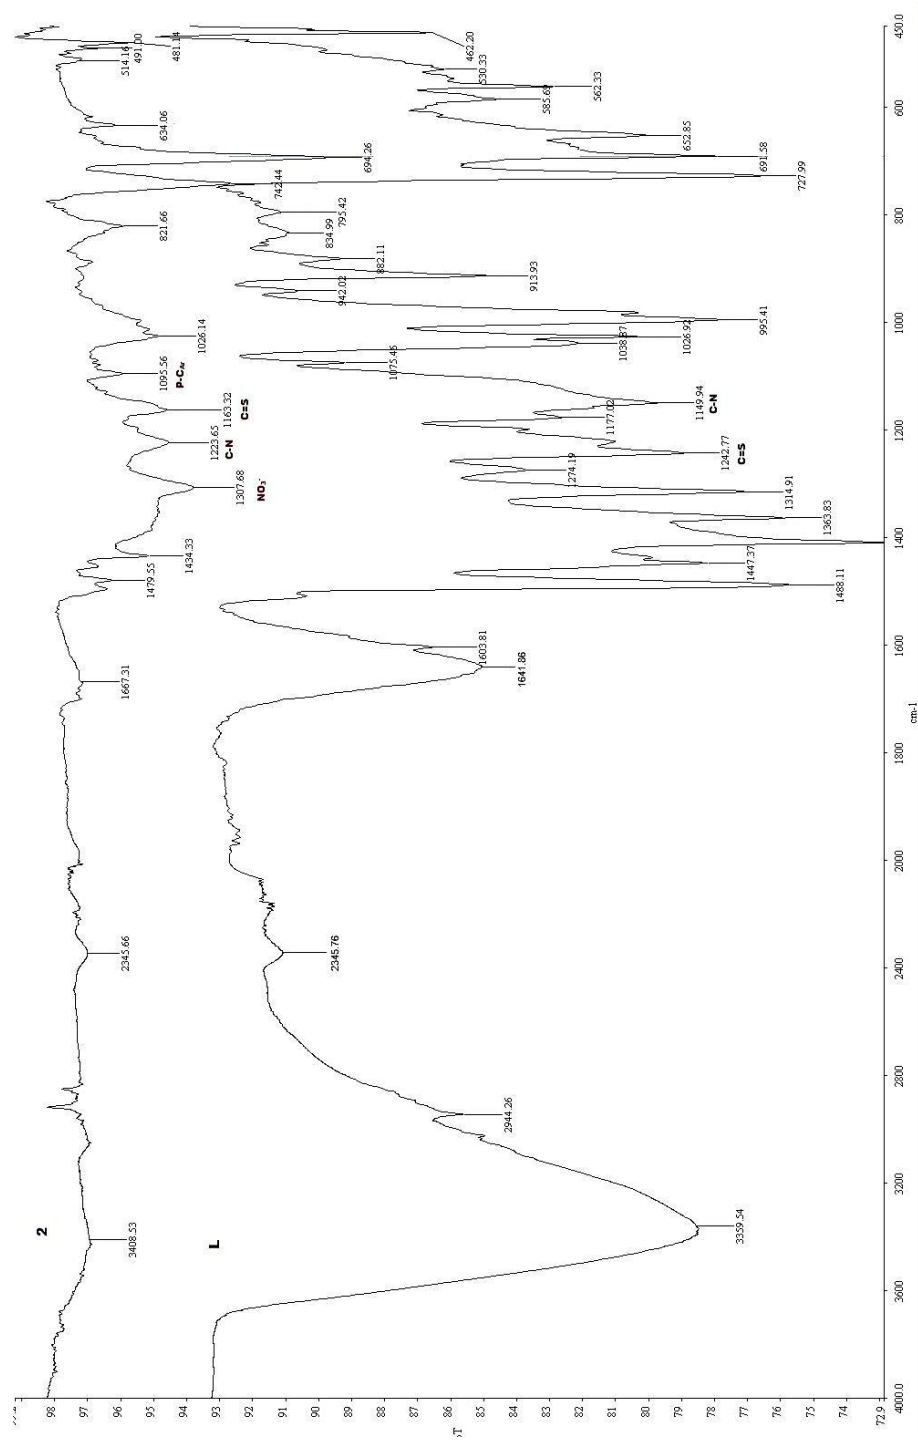

**Figure S2:** Comparison of the FTIR spectra for 3-benzyl-1,3-thiazolidine-2-thione (**L**) and complex **2**

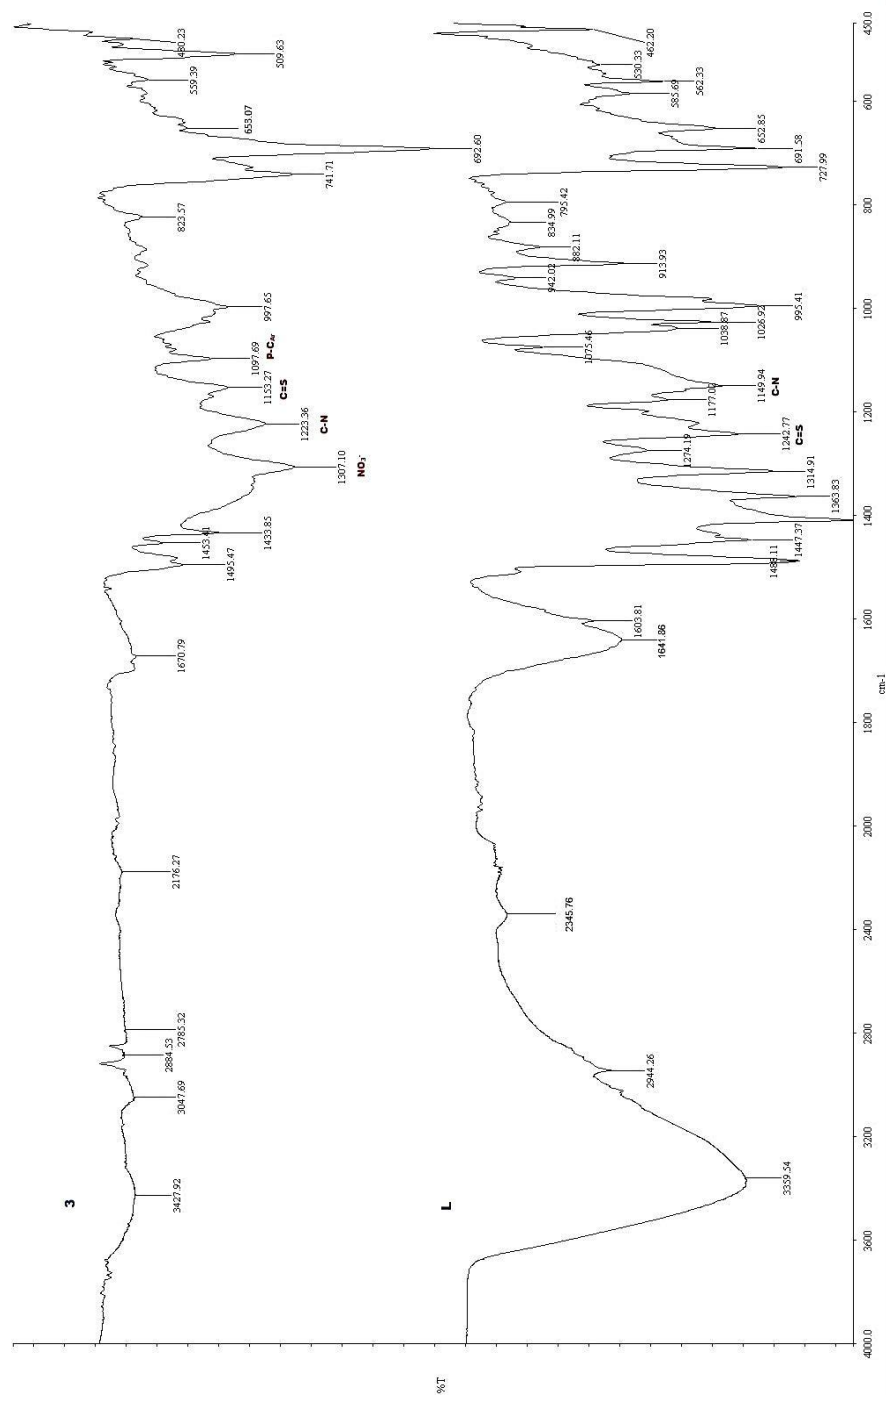

**Figure S3:** Comparison of the FTIR spectra for 3-benzyl-1,3-thiazolidine-2-thione (L) and complex 3

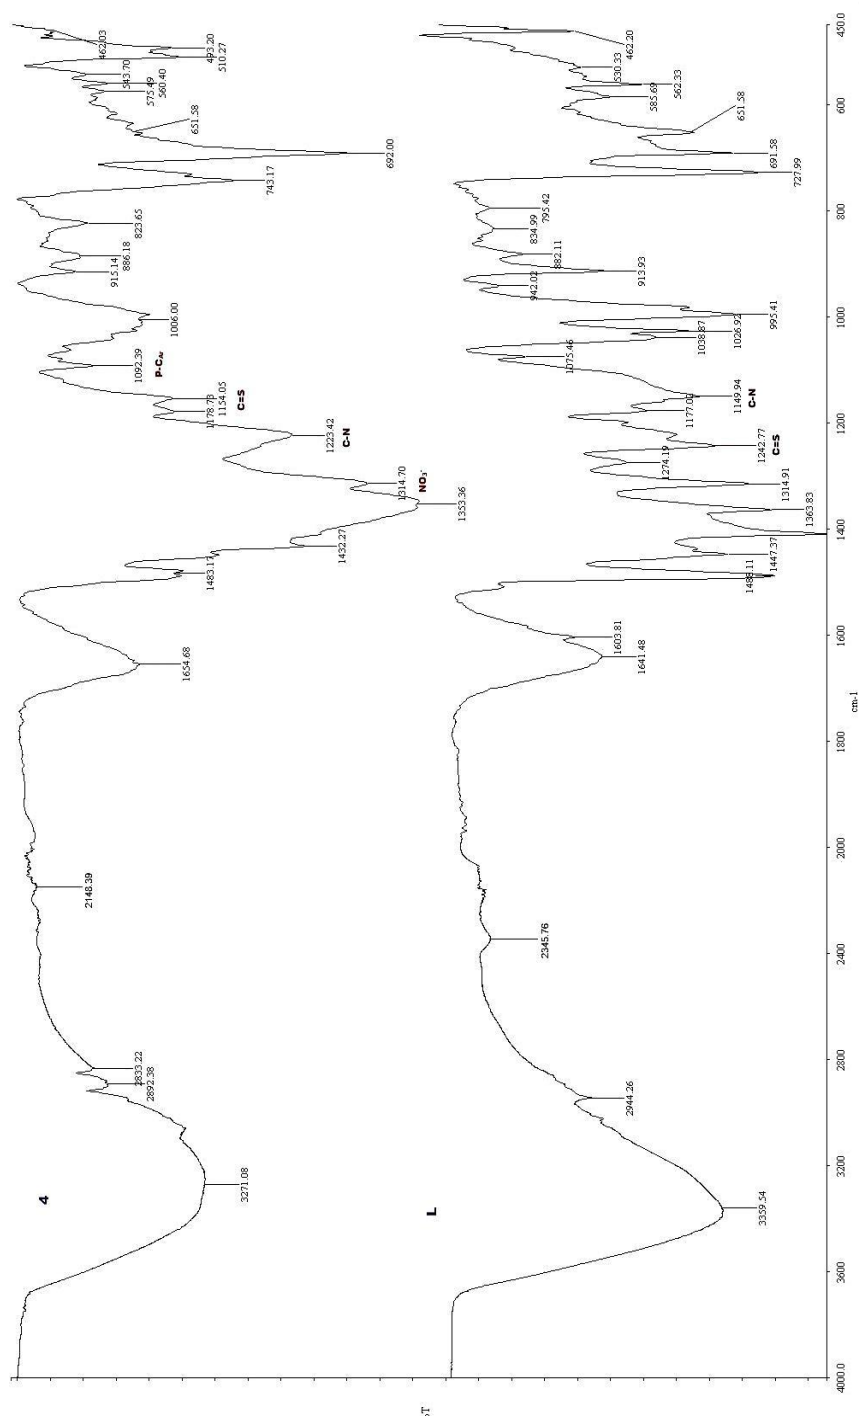

**Figure S4:** Comparison of the FTIR spectra for 3-benzyl-1,3-thiazolidine-2-thione (L) and complex 4

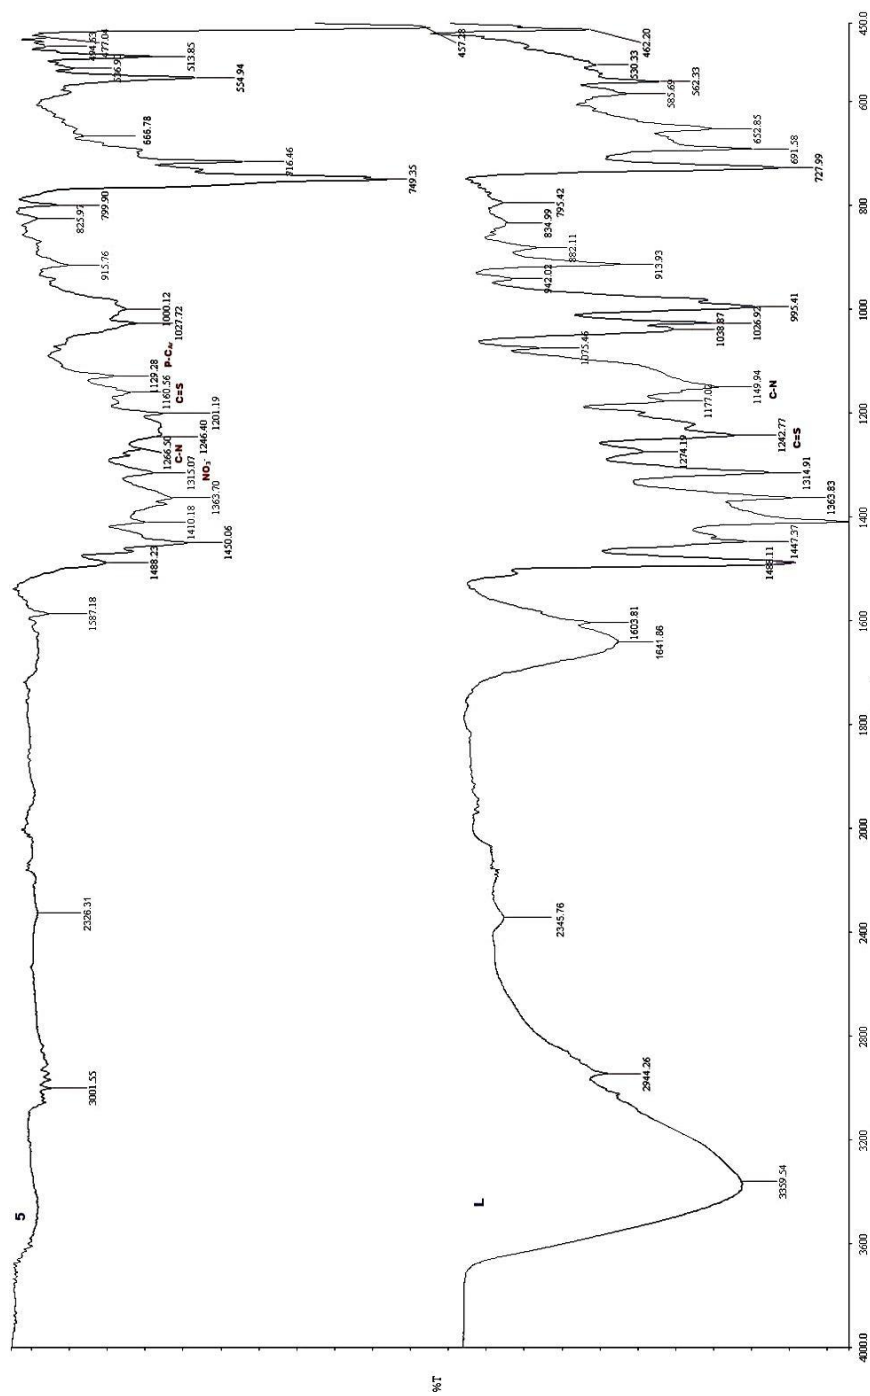

**Figure S5:** Comparison of the FTIR spectra for 3-benzyl-1,3-thiazolidine-2-thione (L) and complex 5

## NMR

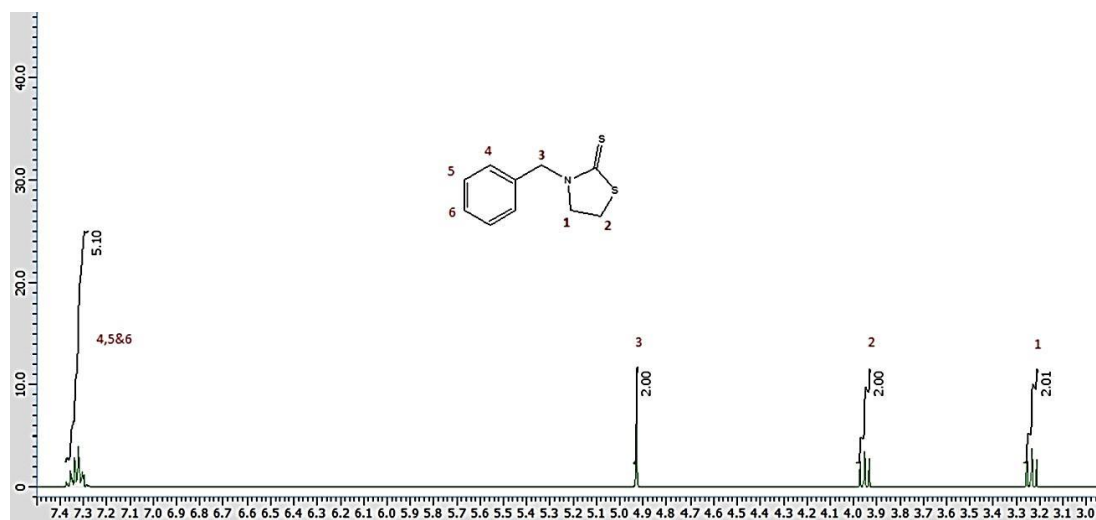

**Figure S6:**  $^1\text{H}$  NMR spectrum for 3-benzyl-1,3-thiazolidine-2-thione (L)

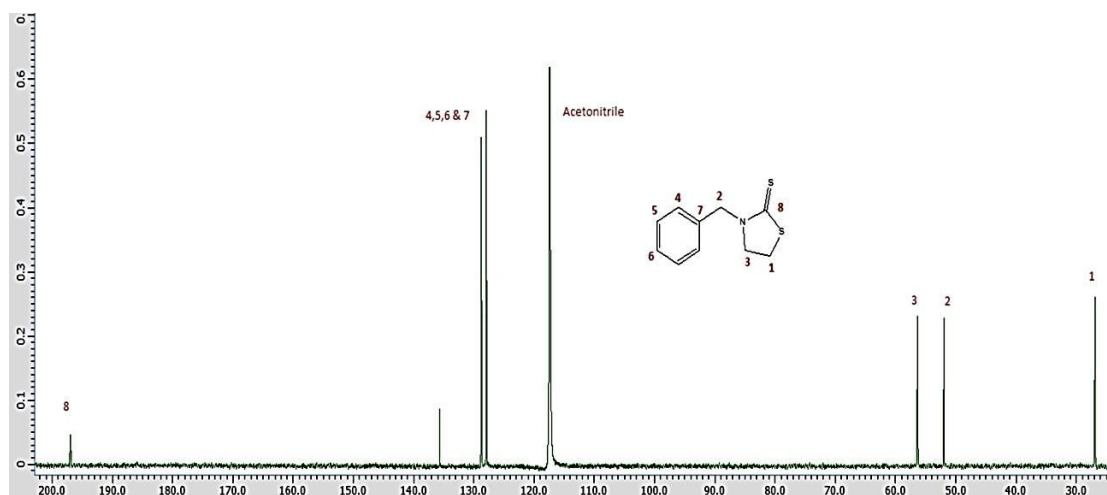

**Figure S7:**  $^{13}\text{C}$  NMR spectrum for 3-benzyl-1,3-thiazolidine-2-thione (L)

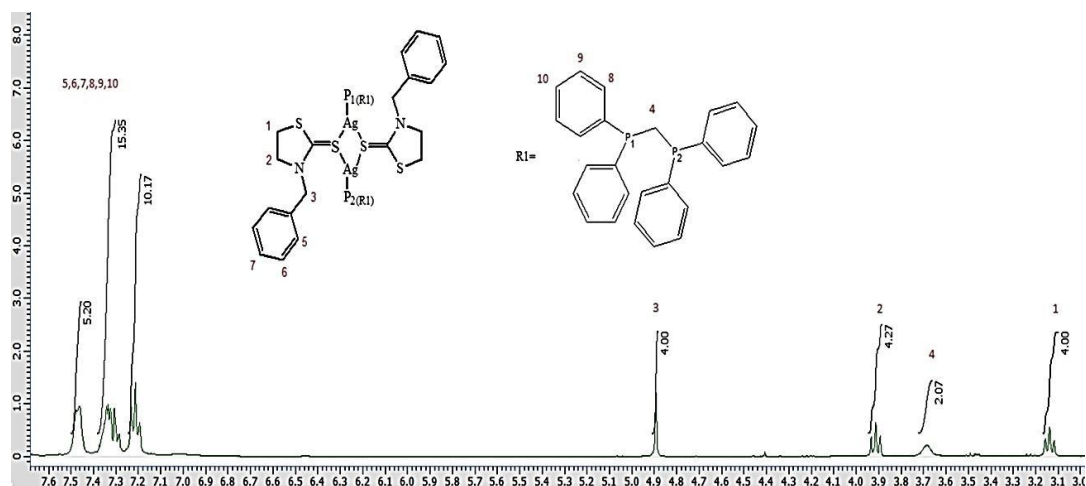

**Figure S8:**  $^1\text{H}$  NMR spectrum for complex **1**

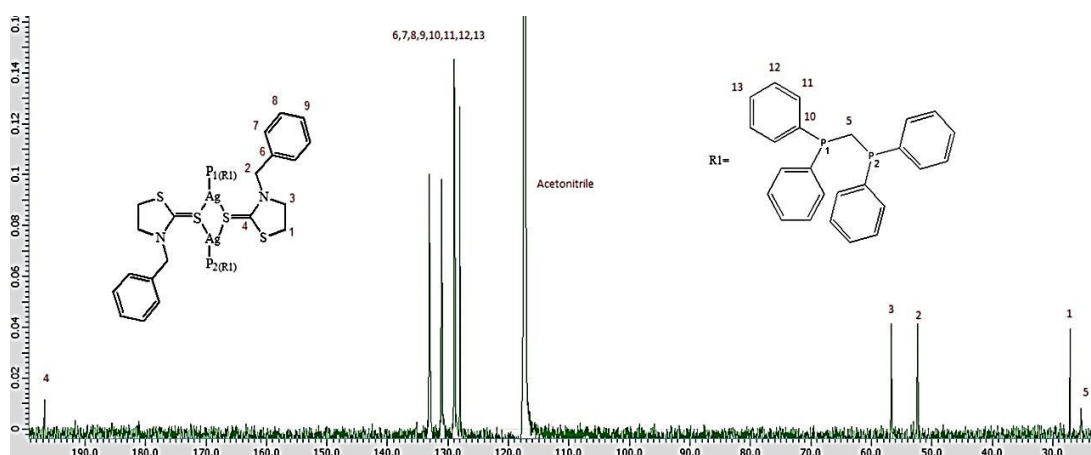

**Figure S9:**  $^{13}\text{C}$  NMR spectrum for complex **1**



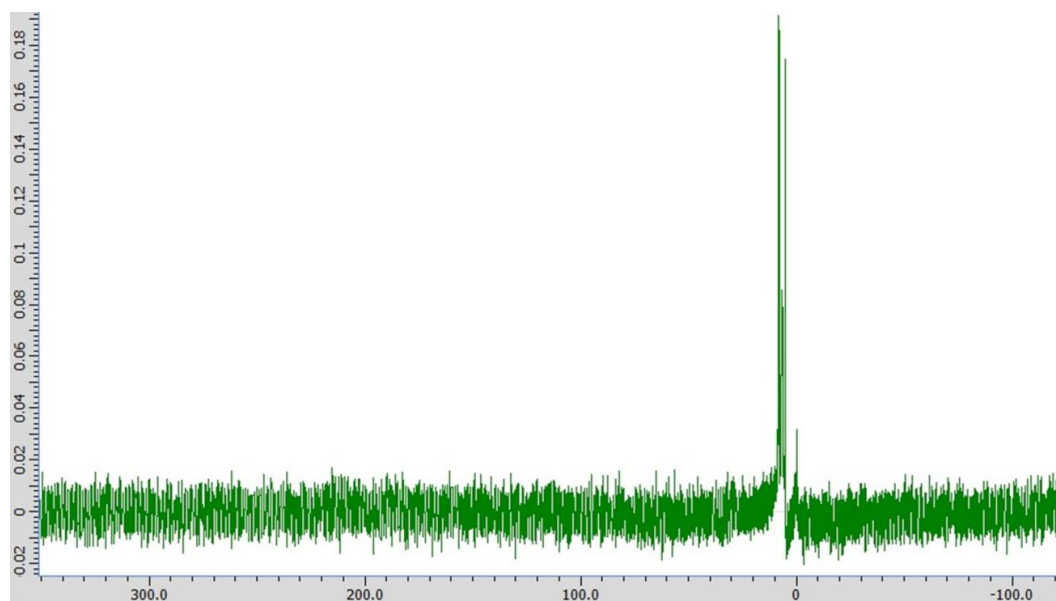

**Figure S10:**  $^{31}\text{P}$  NMR spectrum for complex **1**

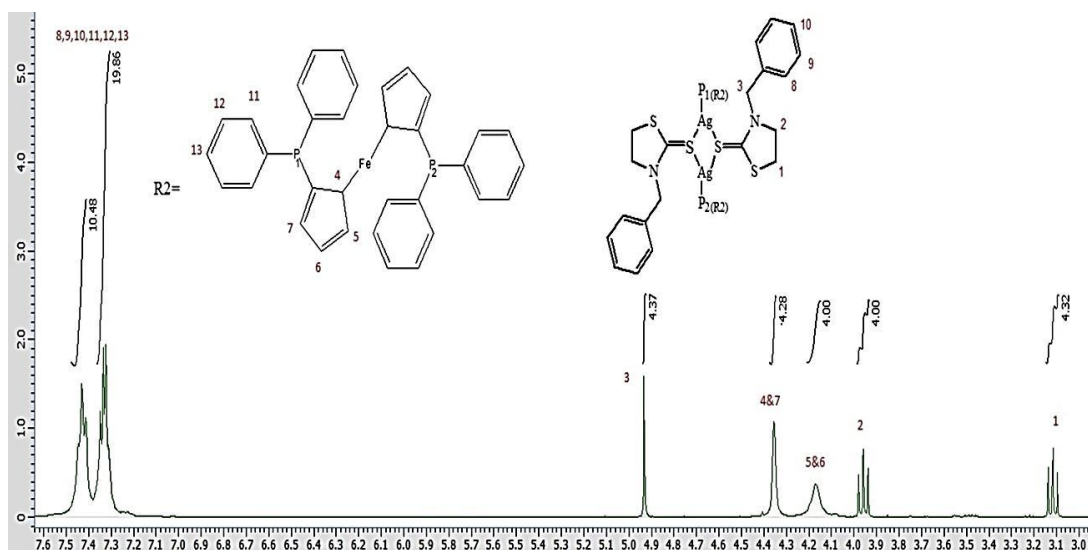

**Figure S11:**  $^1\text{H}$  NMR spectrum for complex **2**

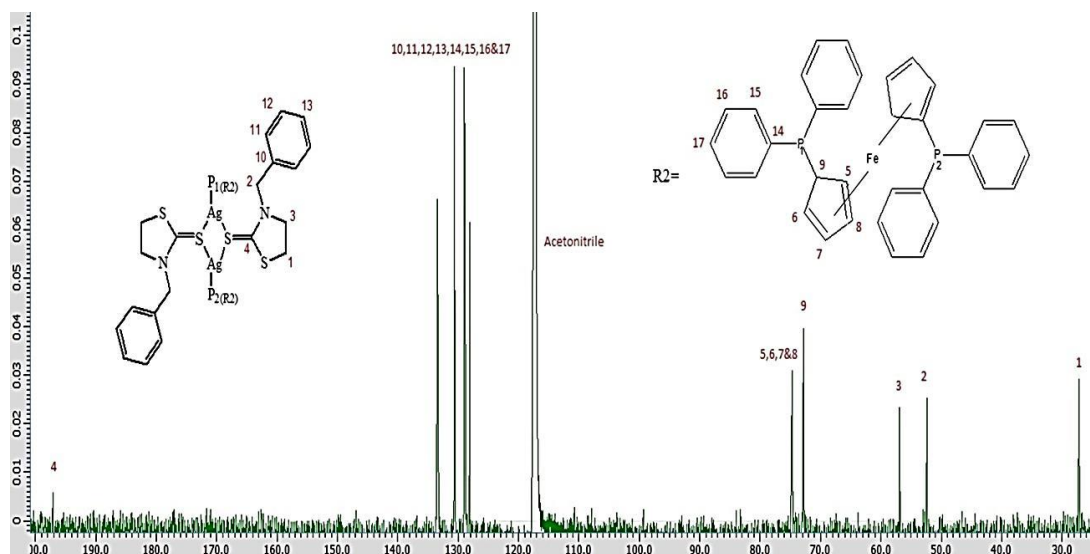

**Figure S12:**  $^{13}\text{C}$  NMR spectrum for complex **2**

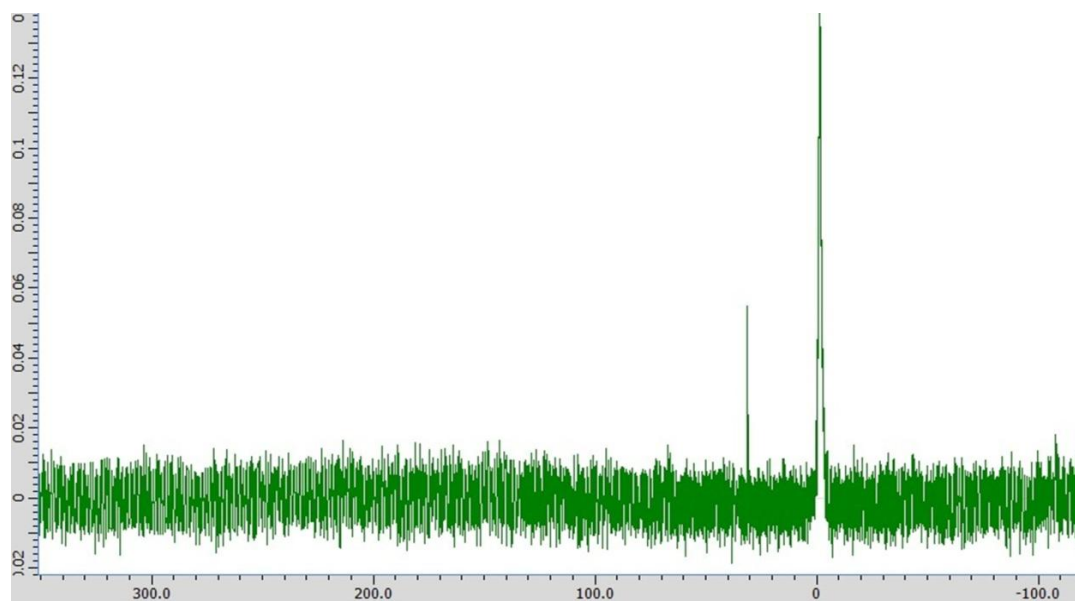

**Figure S13:**  $^{31}\text{P}$  NMR spectrum for complex **2**

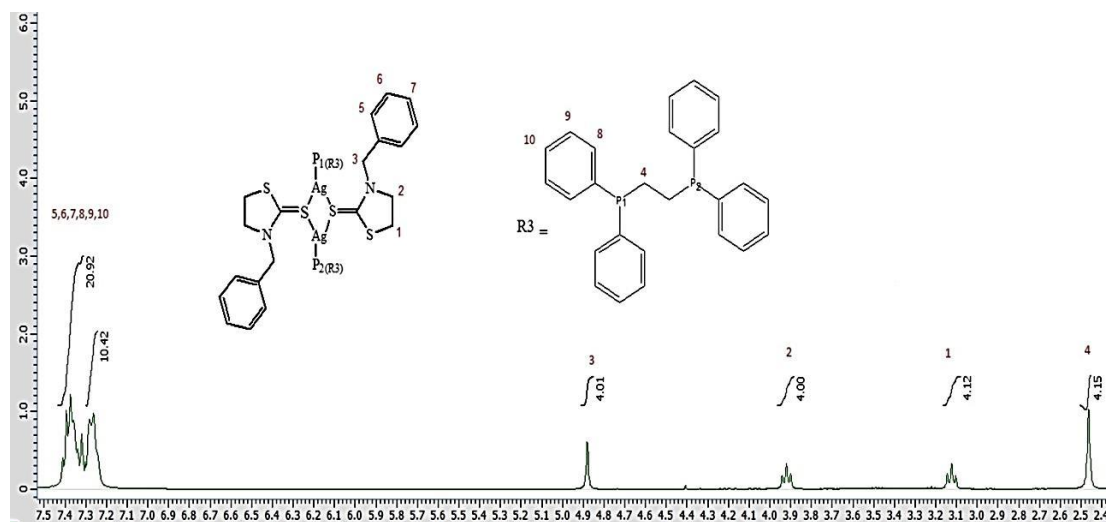

**Figure S14:** <sup>1</sup>H NMR spectrum for complex **3**

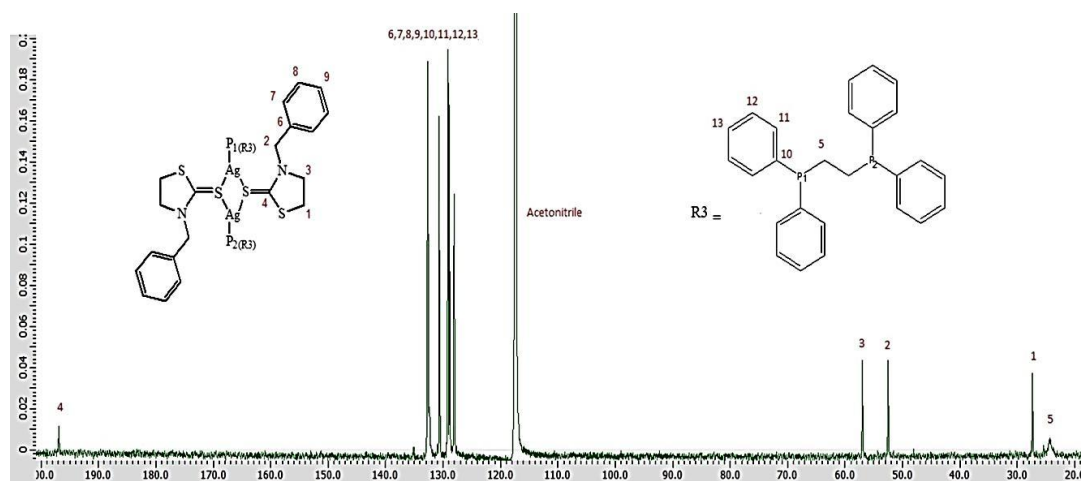

**Figure S15:** <sup>13</sup>C NMR spectrum for complex **3**

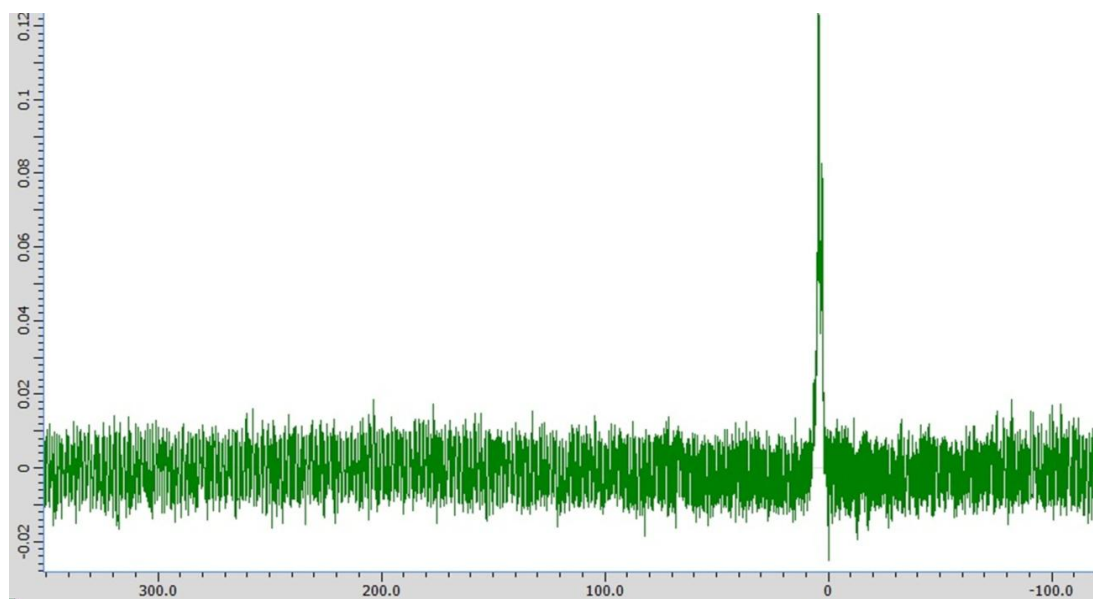

**Figure S16:**  $^{31}\text{P}$  NMR spectrum for complex **3**

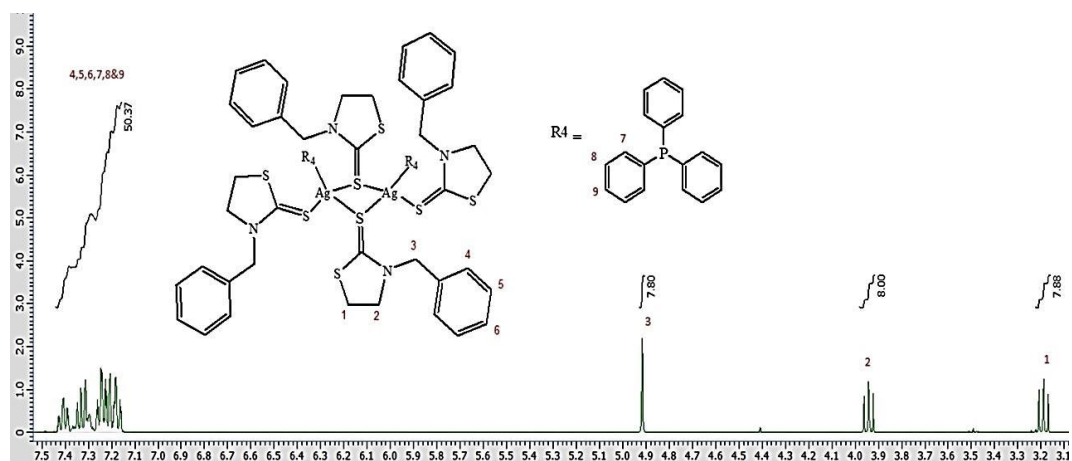

**Figure S17:**  $^1\text{H}$  NMR spectrum for complex **4**

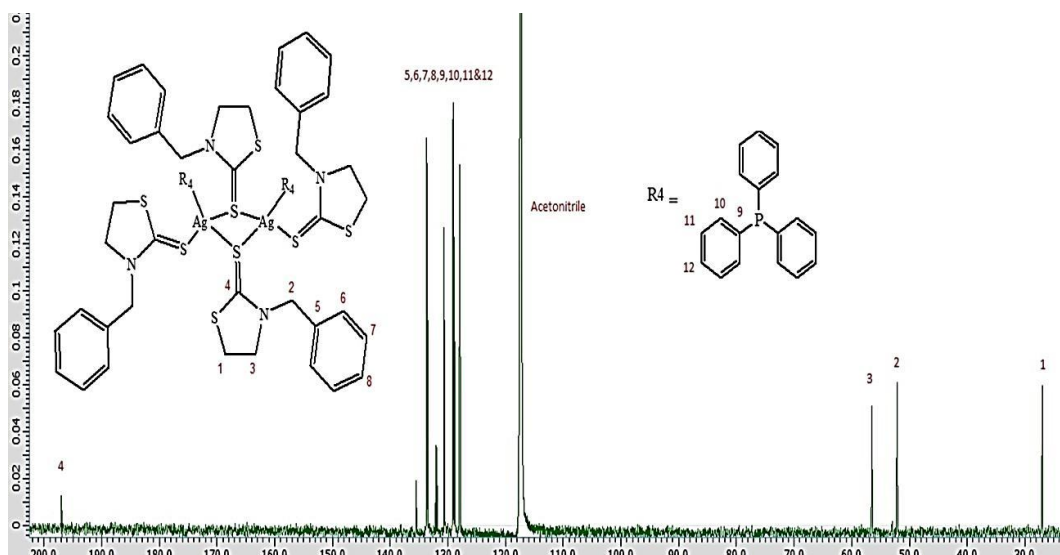

**Figure S18:**  $^{13}\text{C}$  NMR spectrum for complex **4**

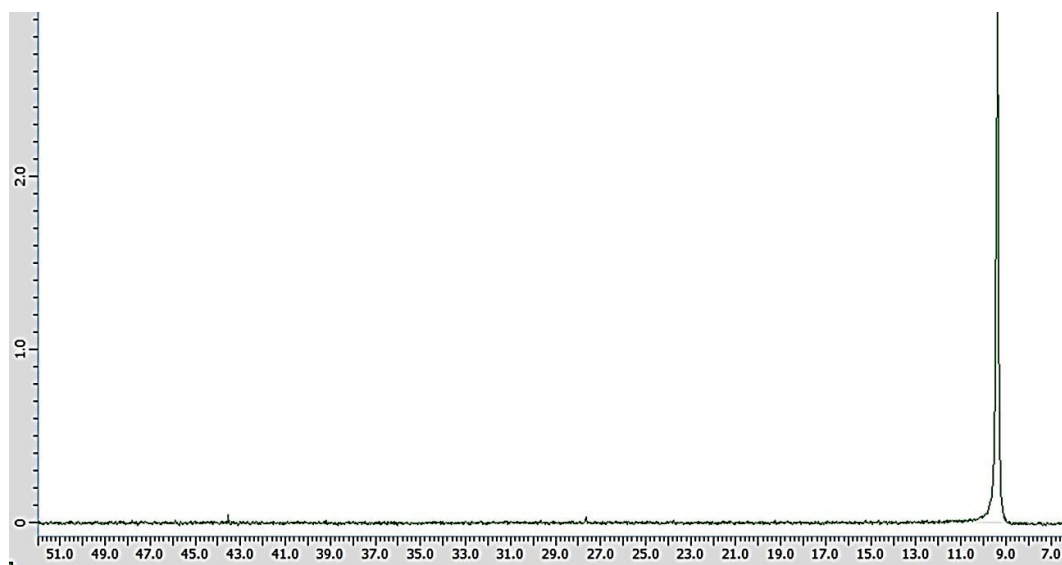

**Figure S19:**  $^{31}\text{P}$  NMR spectrum for complex **4**

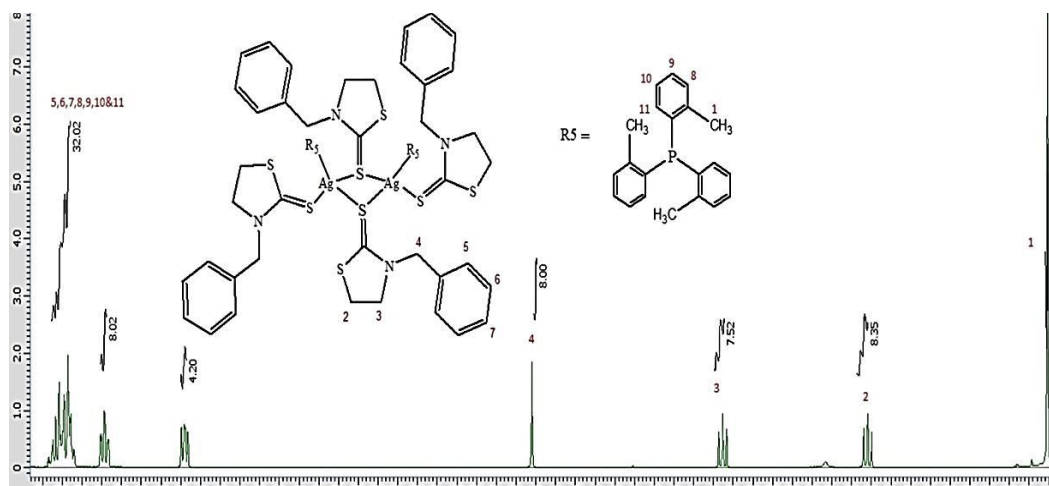

**Figure S20:**  $^1\text{H}$  NMR spectrum for complex **5**

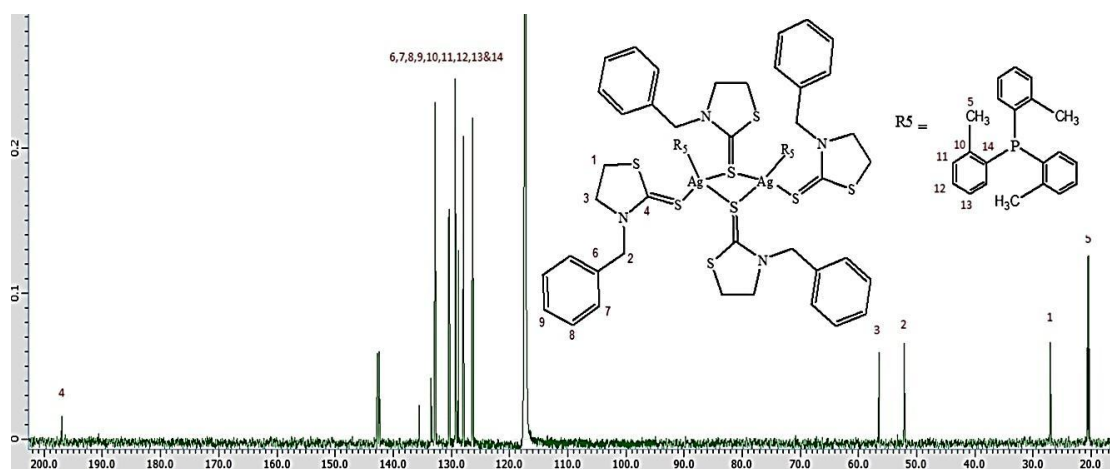

**Figure S21:**  $^{13}\text{C}$  NMR spectrum for complex **5**

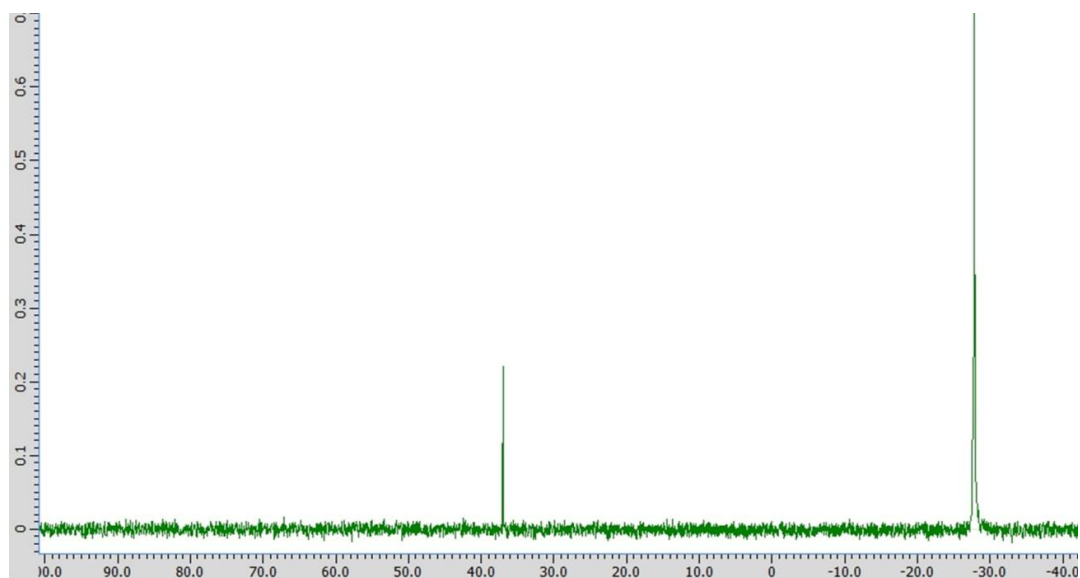

**Figure S22:**  $^{31}\text{P}$  NMR spectrum for complex **5**

## EDX

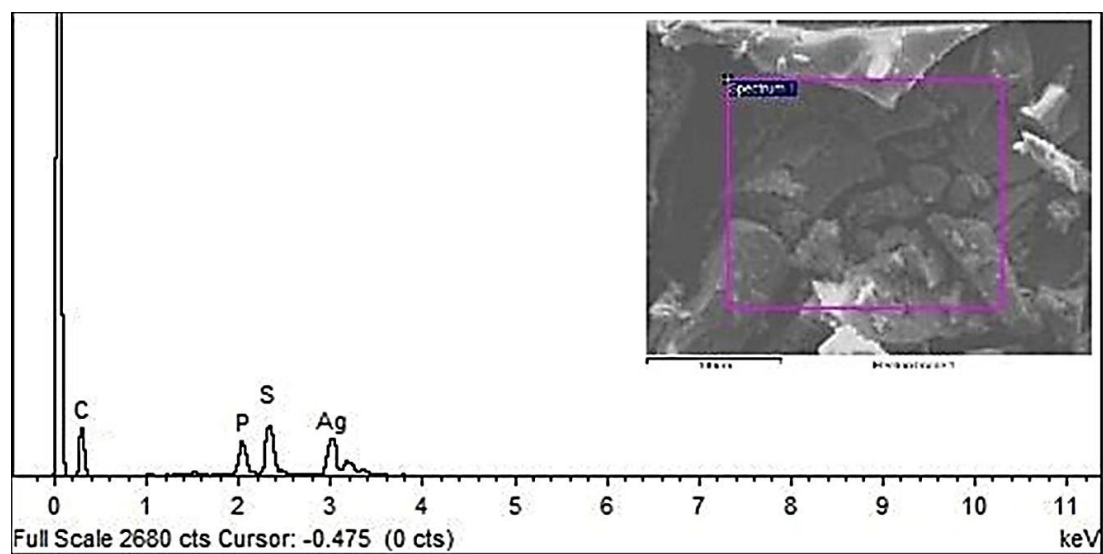

**Figure S23:** EDX analysis for complex 1

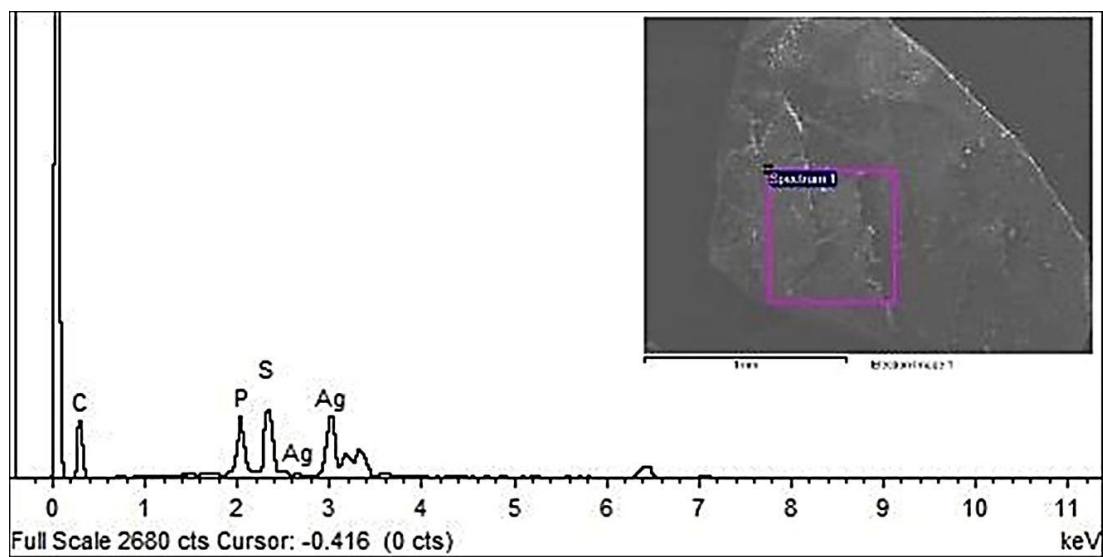

**Figure S24:** EDX analysis for complex 2



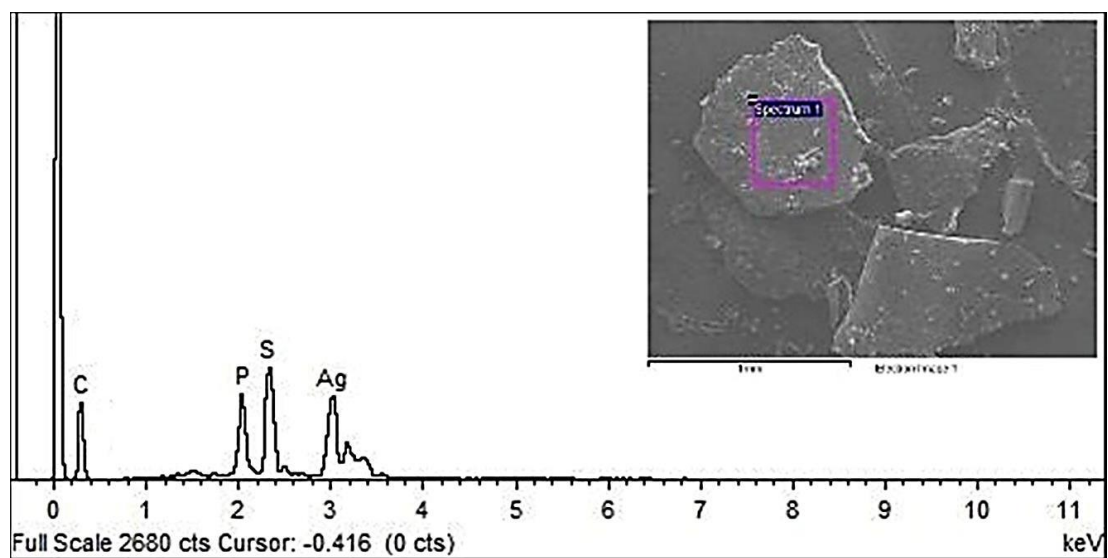

**Figure S25:** EDX analysis for complex 3

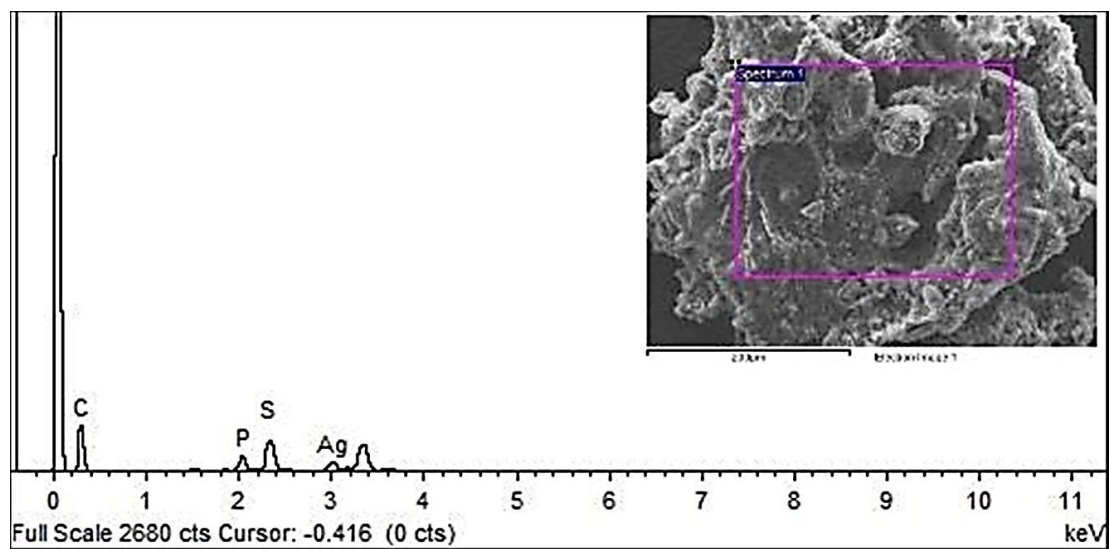

**Figure S26:** EDX analysis for complex 4

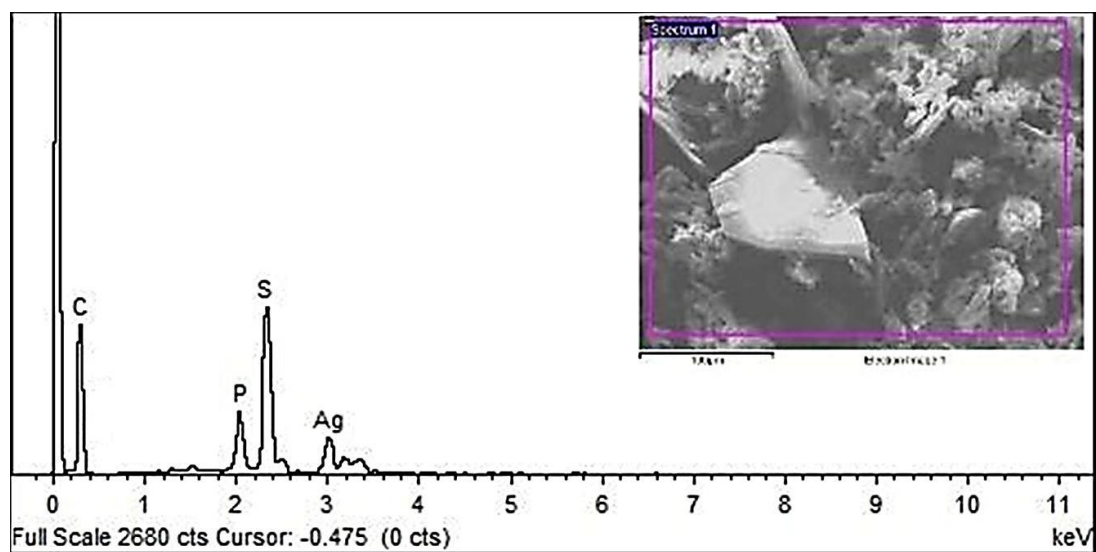

**Figure S27:** EDX analysis for complex **5**

## PXRD

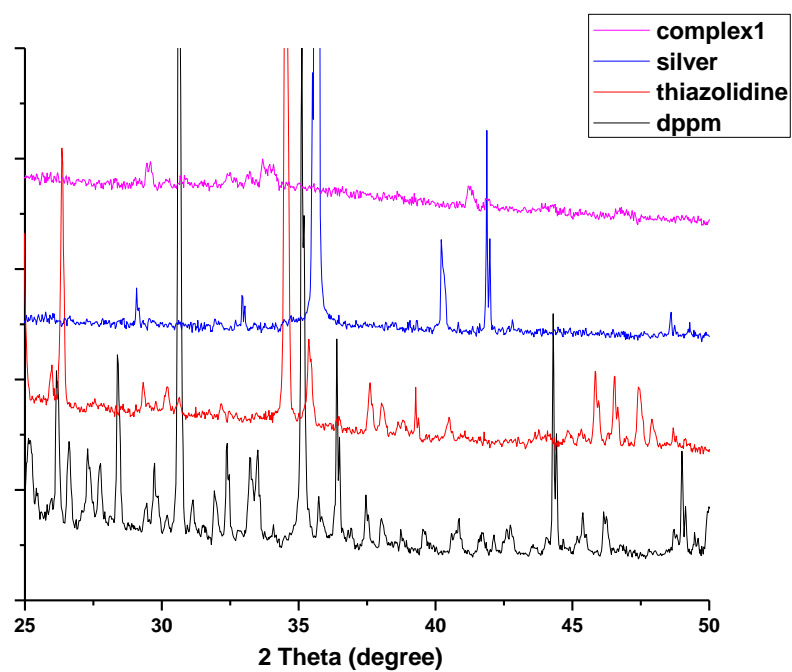

**Figure S28:** PXRD results for complex 1

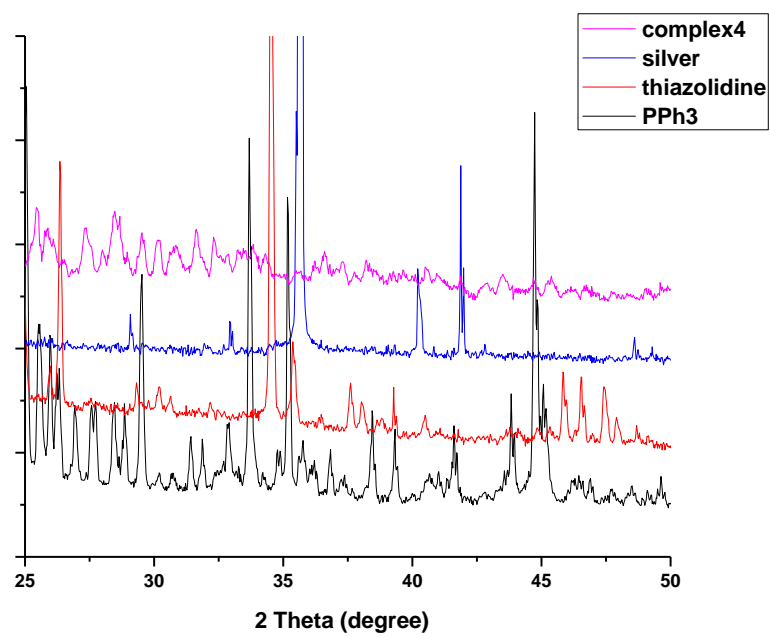

**Figure S29:** PXRD results for complex 4

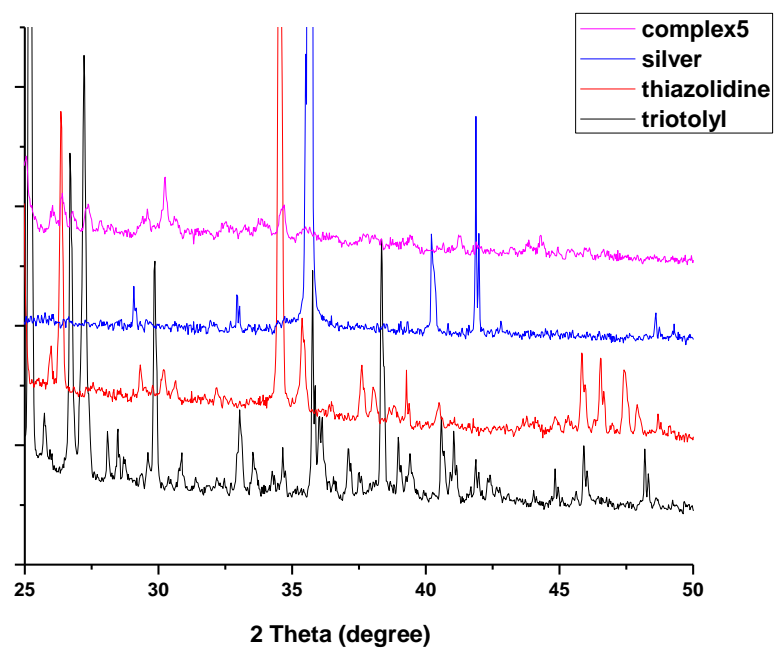

**Figure S30:** PXRD results for complex **5**

## TGA

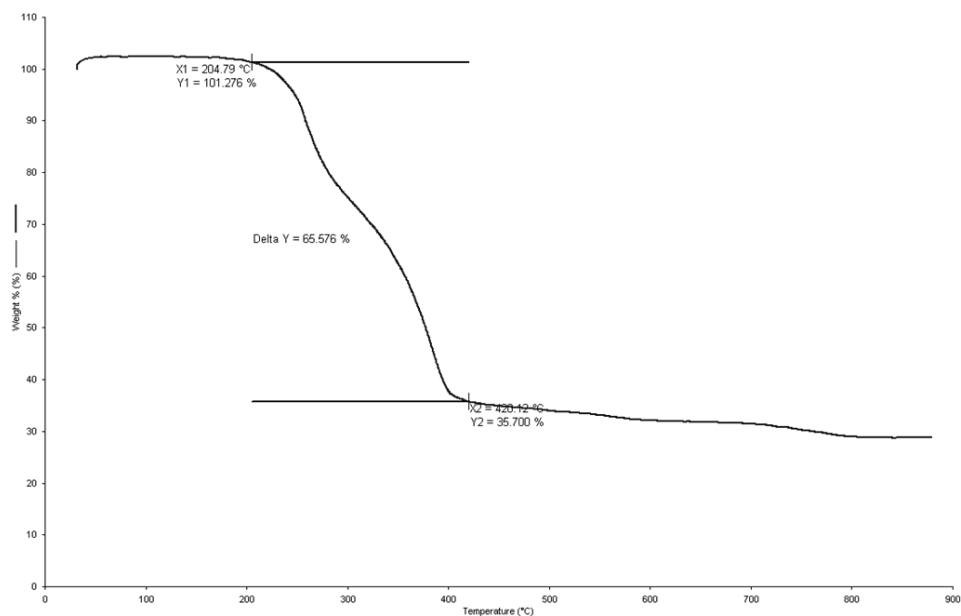

**Figure S31:** TGA results for complex 1

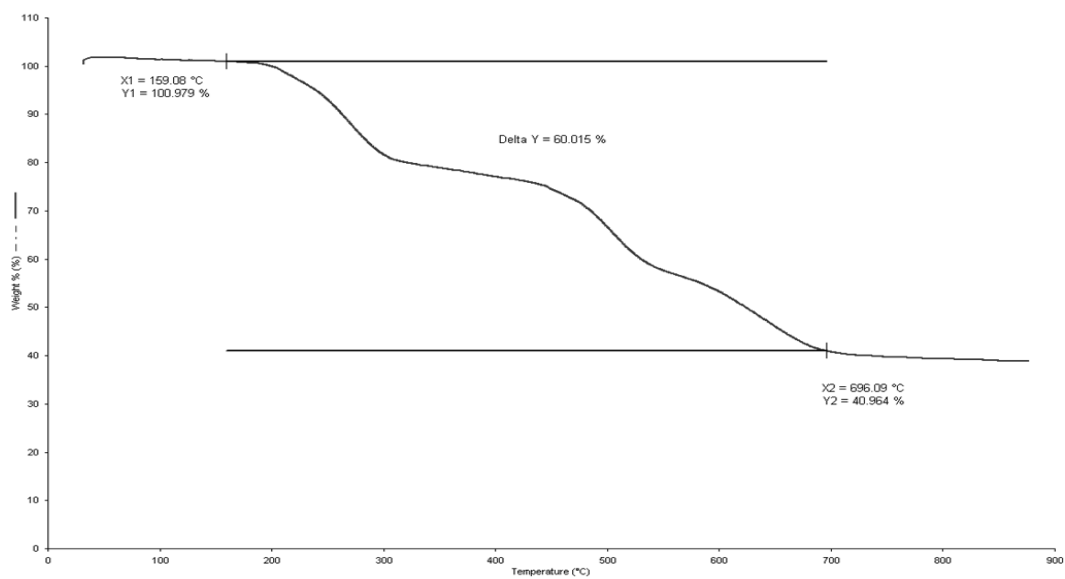

**Figure S32:** TGA result for complex 2

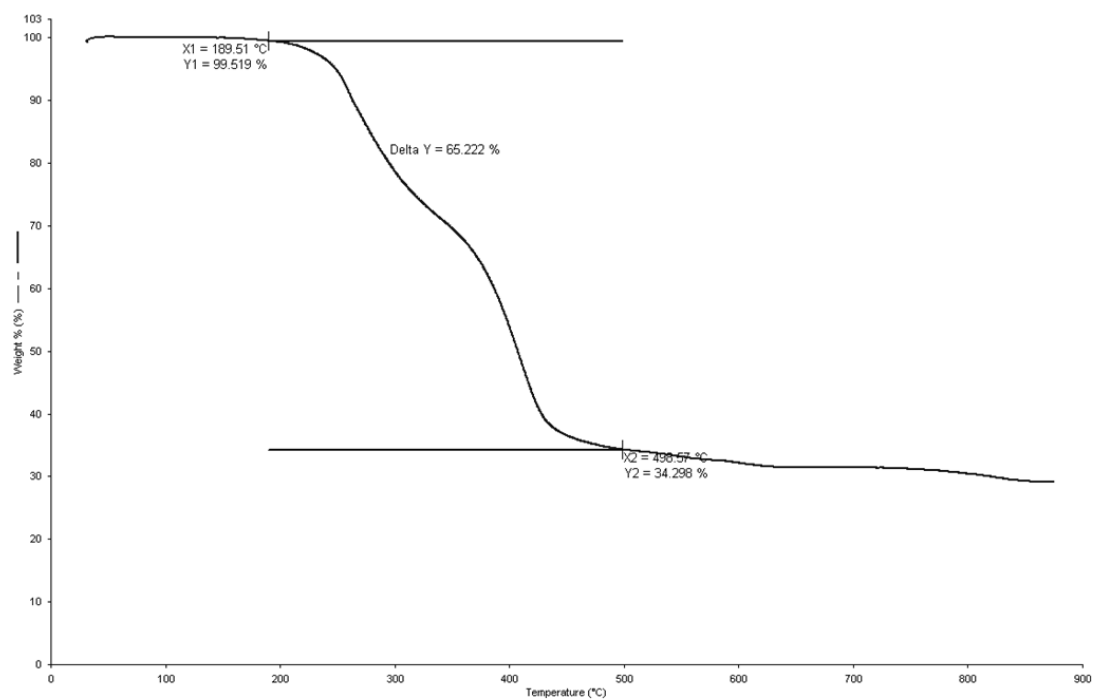

**Figure S33:** TGA result for complex 3

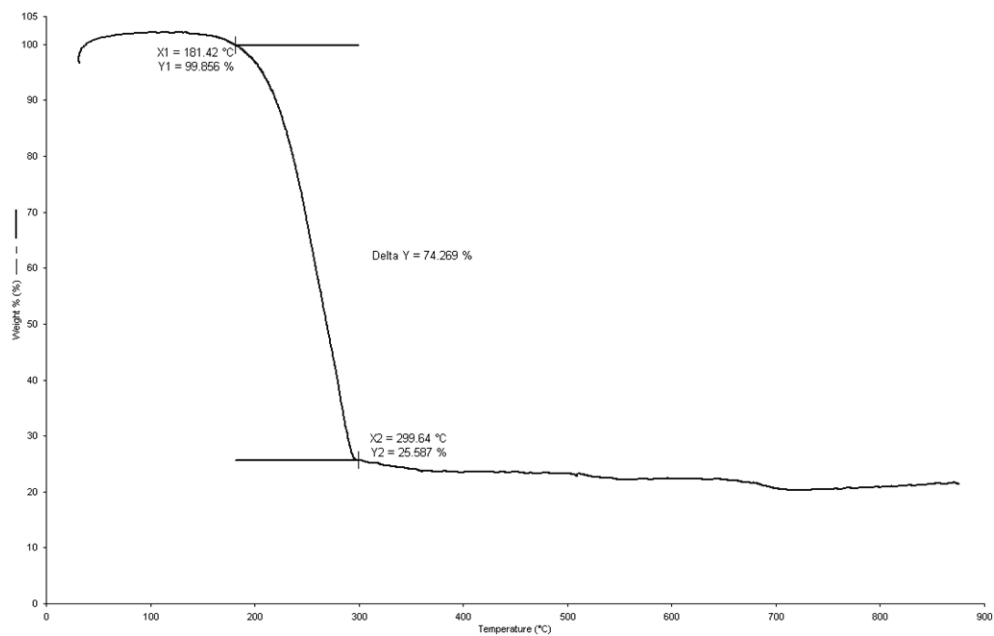

**Figure S34:** TGA result for complex 4

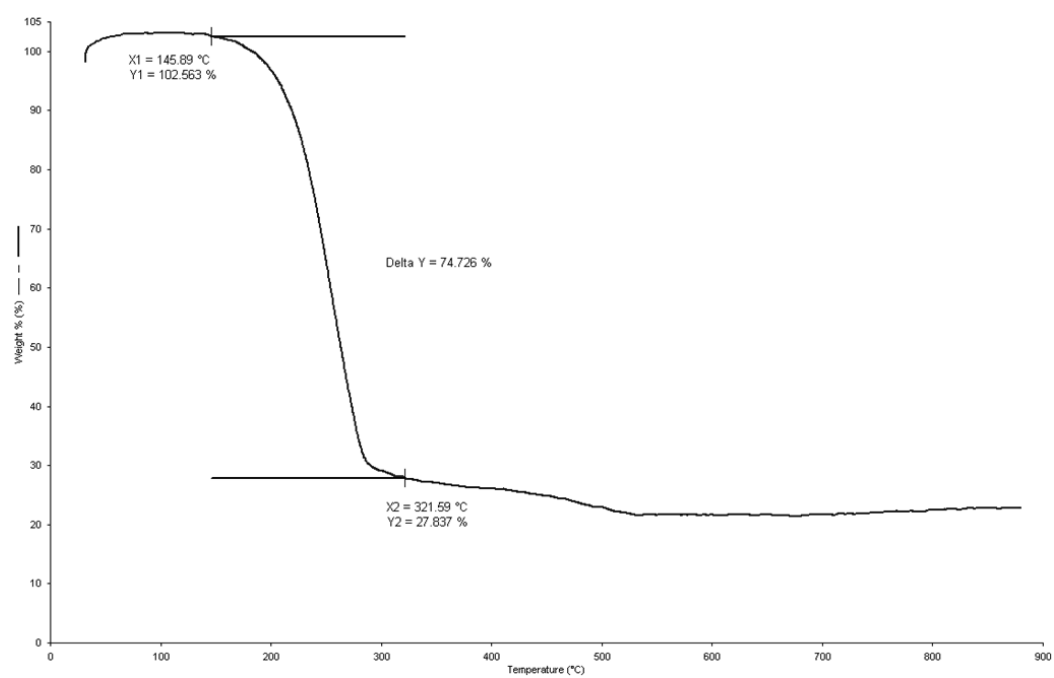

**Figure S35:** TGA result for complex **5**
